# Supplementary material
Source: PubMed Central journal article supplement (PMC3864722)

## SUPPLEMENTARY DATA

Table S1. Environmental conditions experienced for the different growth periods studied during the two experiments. Tm, PPFD and VPD refer to daily average temperature (°C), daily average photon flux density ( $\mu\text{mole PAR.m}^{-2}$ ) and daily average vapour pressure deficit (kPa), respectively. Values in parenthesis are for minimum and maximum values over the period.

| Year  | Growth period | Tm           | PPFD               | VPD  |                 |
|-------|---------------|--------------|--------------------|------|-----------------|
| Exp 1 | 2009          | 1 (Growth)   | 14.5 (7.2 - 23.6)  | 1018 | 1.3 (0.9 - 2)   |
|       |               | 2 (Regrowth) | 18.9 (14.3 - 25.1) | 1064 | 1.4 (1.1 - 1.9) |
|       | 2012          | 1 (Growth)   | 16.0 (9.9 - 22.7)  | 934  | 1.4 (0.7 - 2)   |
|       |               | 2 (Regrowth) | 18.4 (15.4 - 26.5) | 981  | 1.5 (1.1 - 2.1) |
| Exp 2 | 2009          | 1 (Growth)   | 14.5 (7.2 - 23.6)  | 1018 | 1.3 (0.9 - 2)   |
|       |               | 2 (Regrowth) | 18.9 (14.3 - 25.1) | 1064 | 1.4 (1.1 - 1.9) |
|       | 2010          | 1 (Growth)   | 15.1 (7.8 - 22.5)  | 919  | 1.4 (0.8 - 1.8) |
|       |               | 2 (Regrowth) | 21.0 (13.1 - 26.5) | 1136 | 1.7 (1.1 - 2.2) |

Fig. S1. Diagrams of a) the arrangement of the main axis, secondary and tertiary axes on a seedling plant (initial growth cycle) and b) the types of main axes emerging either from the taproot (T2) or from the axil of a leaf just below the cutting height (T1) of a mature plant during a regrowth cycle. Redrawn from Moreau et al. (2007) and Gosse et al. (1988)

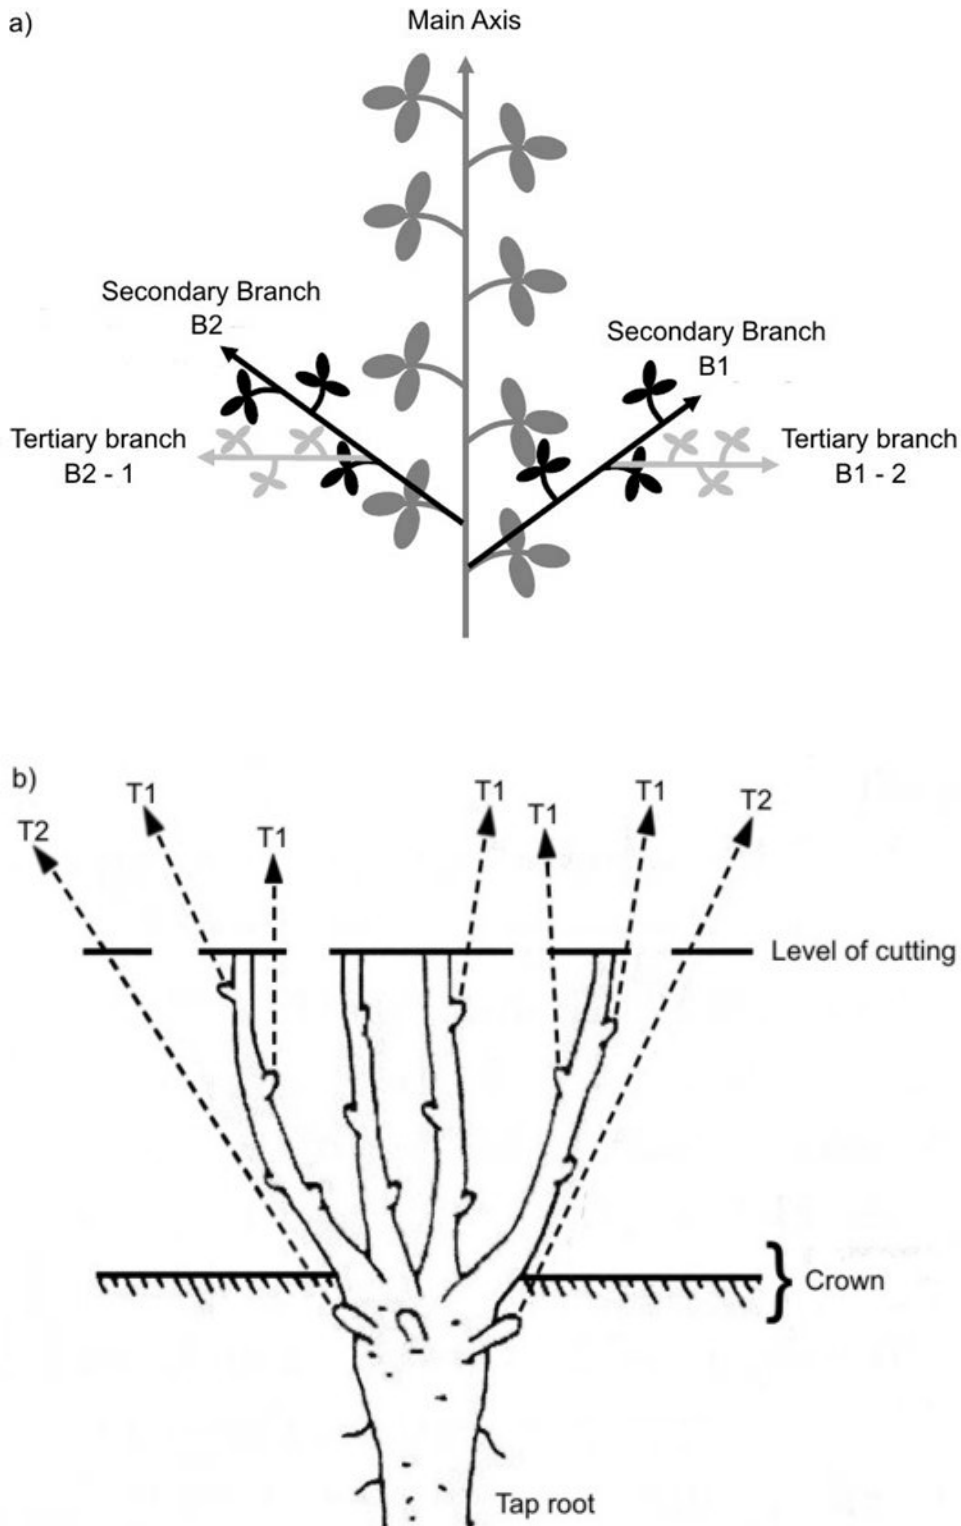

Fig. S2. Number of leaves on branches as a function of thermal-time accumulation expressed in cumulative degree-days from shoot emergence during the growth phases of Exp. 1. Open and closed symbols indicate 2012 and 2009 data, respectively. Date of branch appearance (*DA*) and phyllochron (*RLa*<sup>-1</sup>) estimated from linear regressions are indicated in each panel.

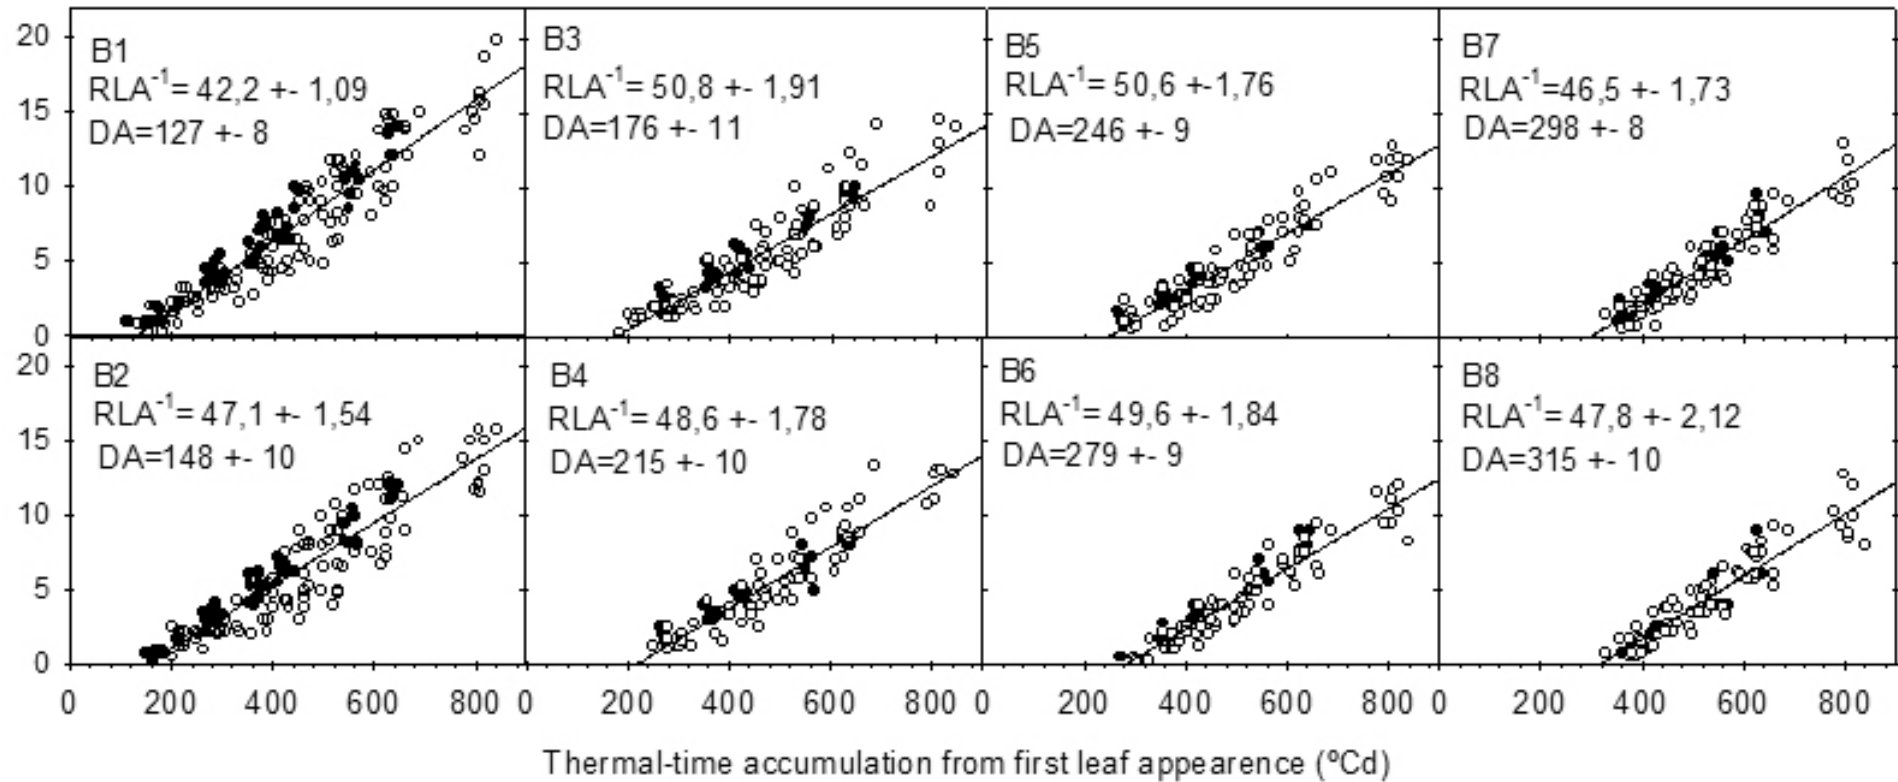

Fig. S3. Dynamics of canopy light interception efficiency measured in the different pure and mixture stands studied.

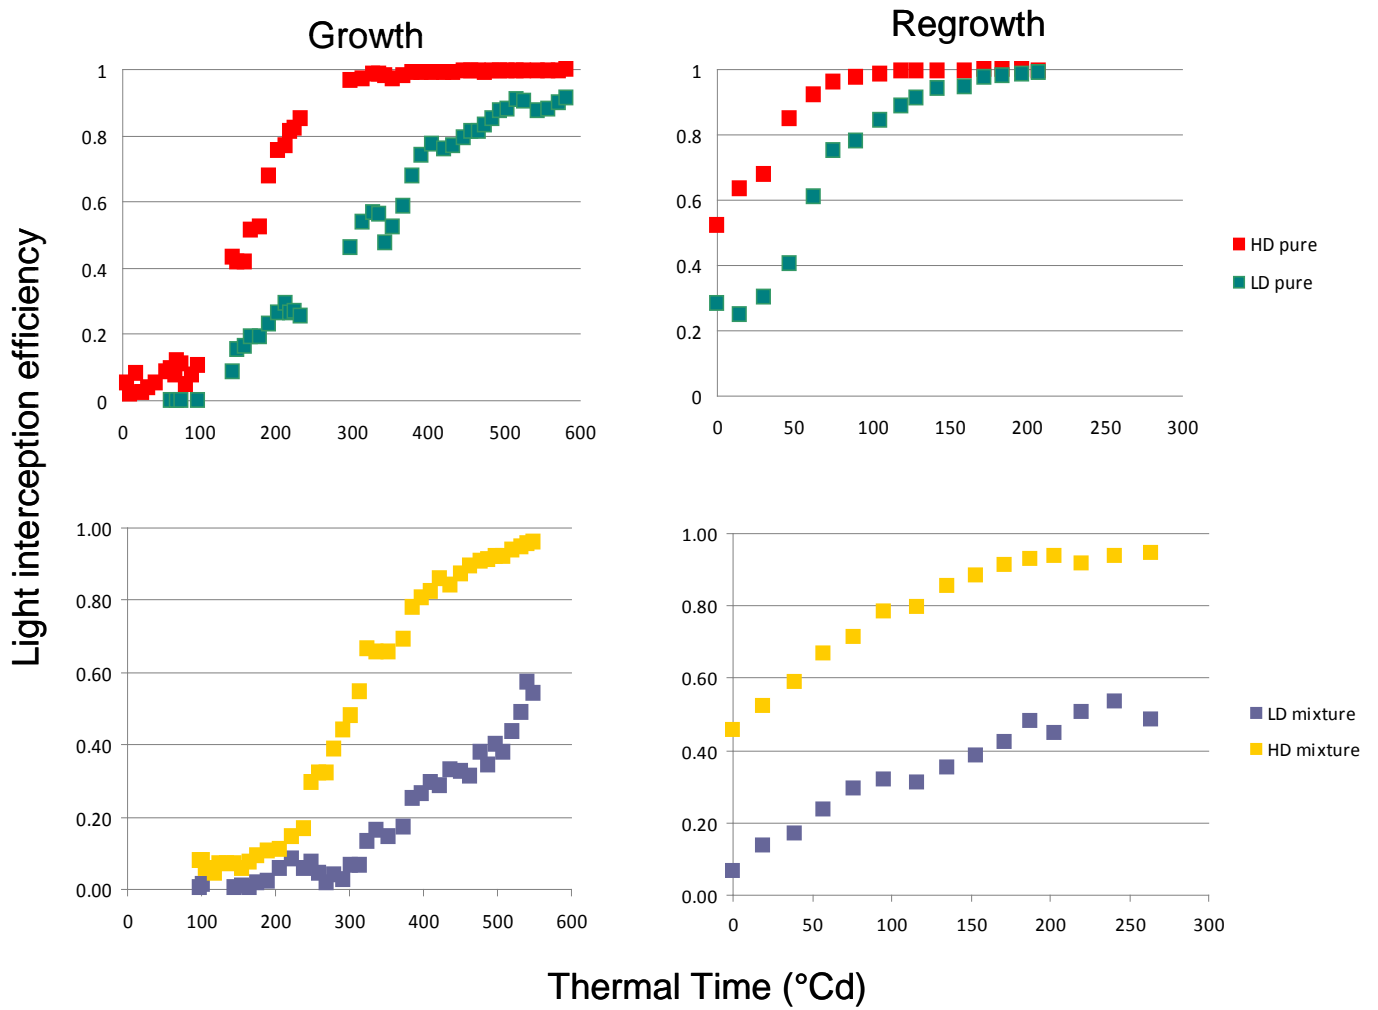

Supplement: supp_mct251_mct251supp.pdf [file supp_mct251_mct251supp.pdf]
